# Supplementary material for: Widespread changes in mRNA stability contribute to quiescence-specific gene expression patterns in a fibroblast model of quiescence
Source: PubMed Central journal article supplement (PMC5286691; doi:10.1186/s12864-017-3521-0), 2017-02-01

**A**

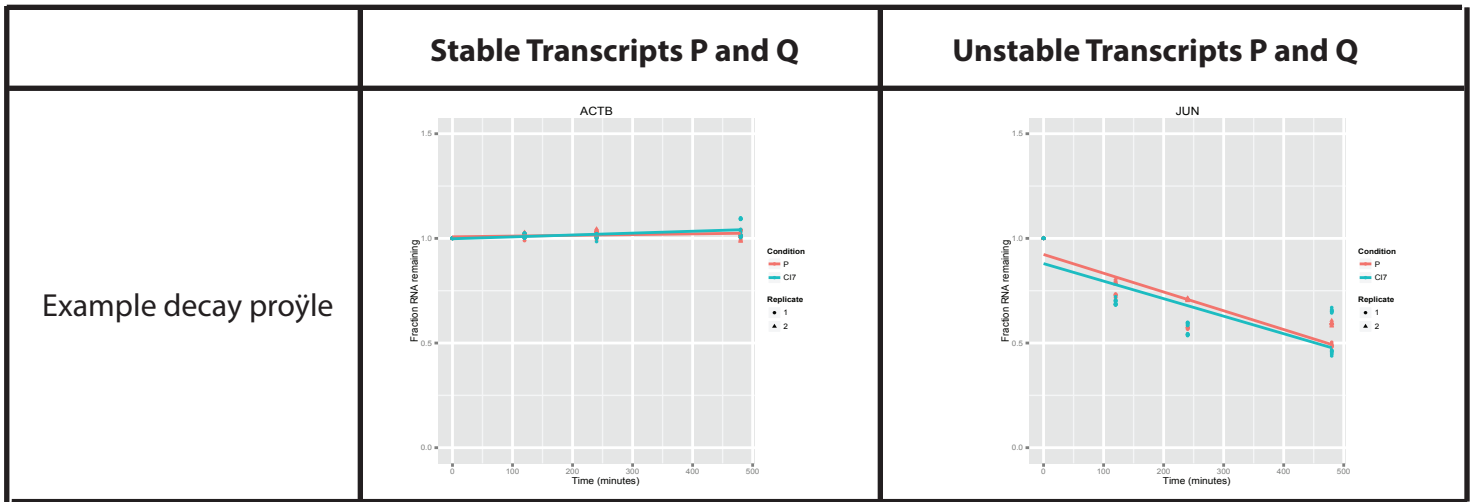

**B**

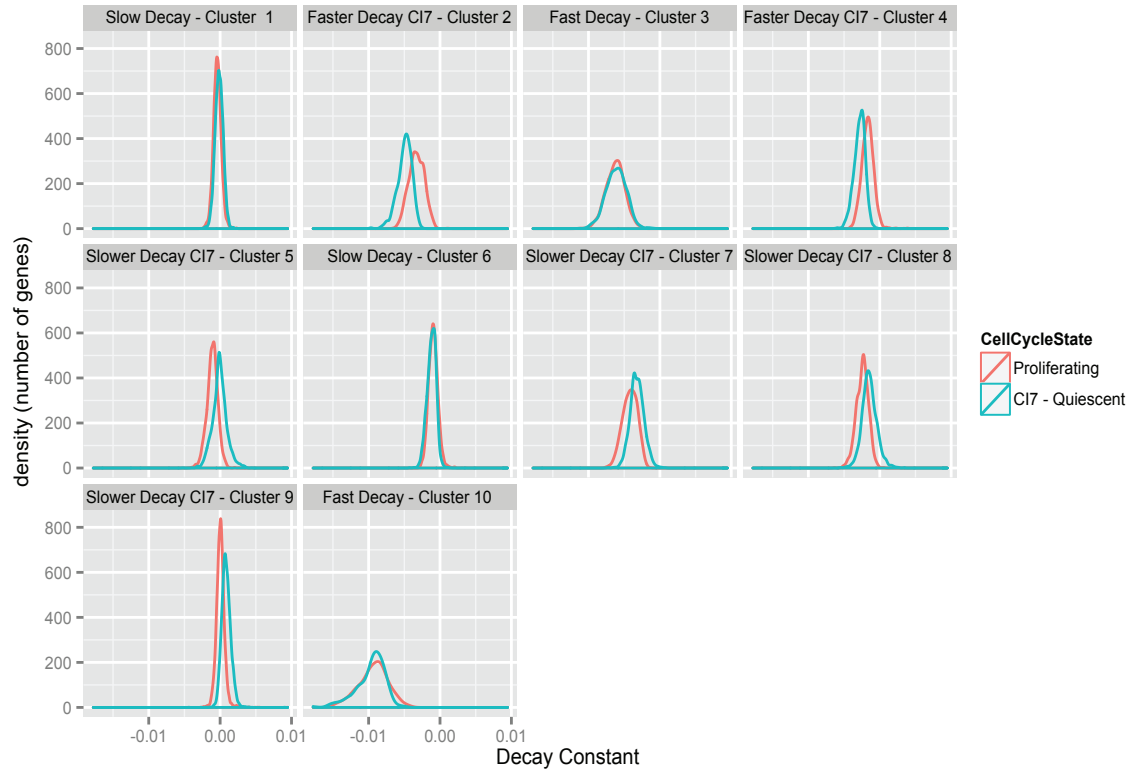

Supplement Fig. 2A

- Overall
- mitochondrial translation (44)
- ribosome biogenesis (87)
- DNA damage response, signal transduction by p53 class mediator resulting in cell cycle arrest (29)
- negative regulation of DNA metabolic process (29)
- negative regulation of cyclin-dependent protein serine/threonine kinase activity (11)
- regulation of ubiquitin-protein ligase activity involved in mitotic cell cycle (30)
- regulation of cellular response to heat (15)
- tRNA metabolic process (33)
- RNA modification (23)
- chaperone-mediated protein complex assembly (5)
- vitamin D receptor signaling pathway (3)
- transcription elongation from RNA polymerase II promoter (21)
- positive regulation of mRNA 3'-end processing (10)
- positive regulation of interferon-beta production (5)
- quinone metabolic process (6)
- transcription from RNA polymerase III promoter (17)
- UMP biosynthetic process (3)
- protein monoubiquitination (19)
- regulation of regulated secretory pathway (6)
- positive regulation of striated muscle cell differentiation (7)
- mitochondrial translational elongation (34)

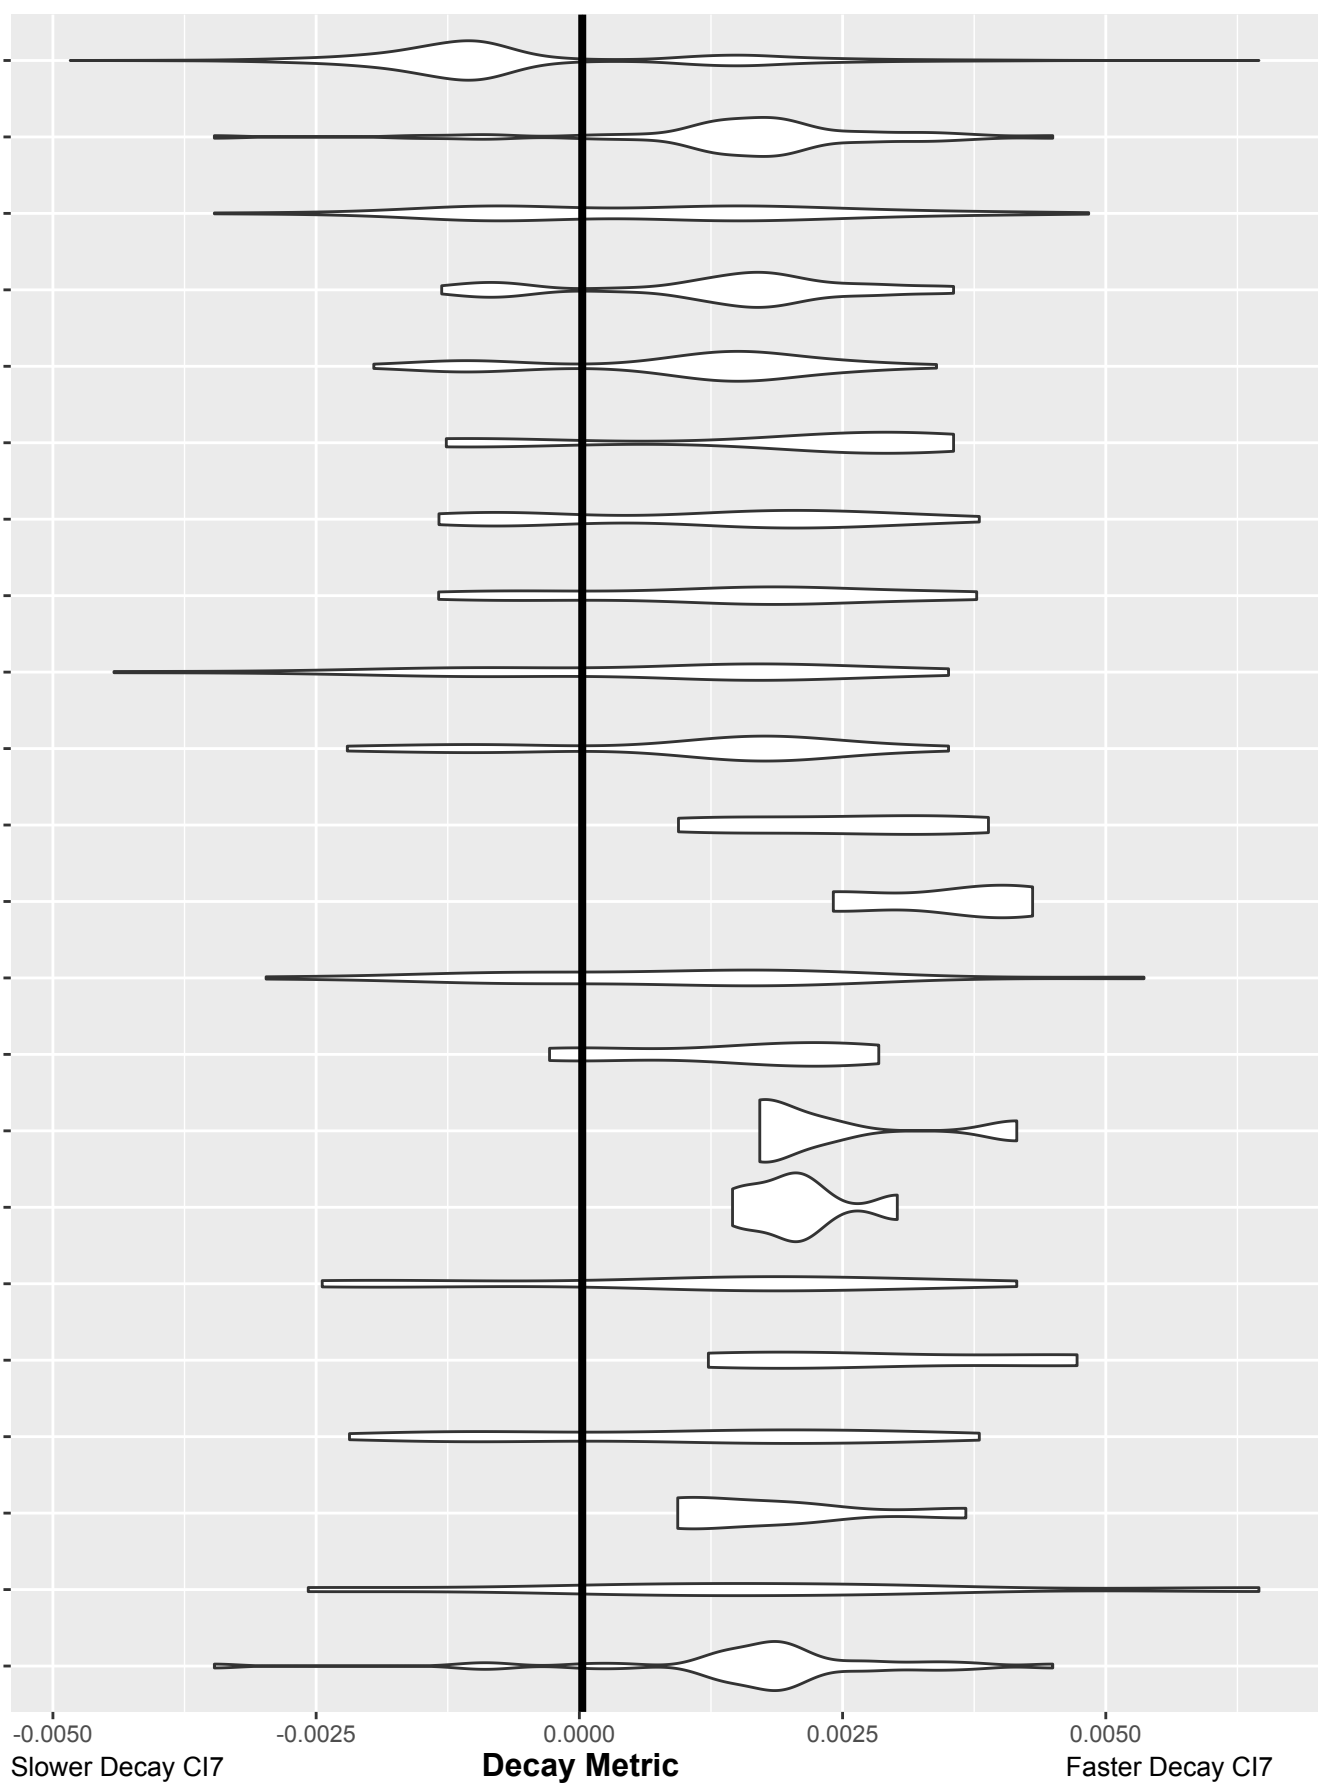

Supplement Fig. 2B

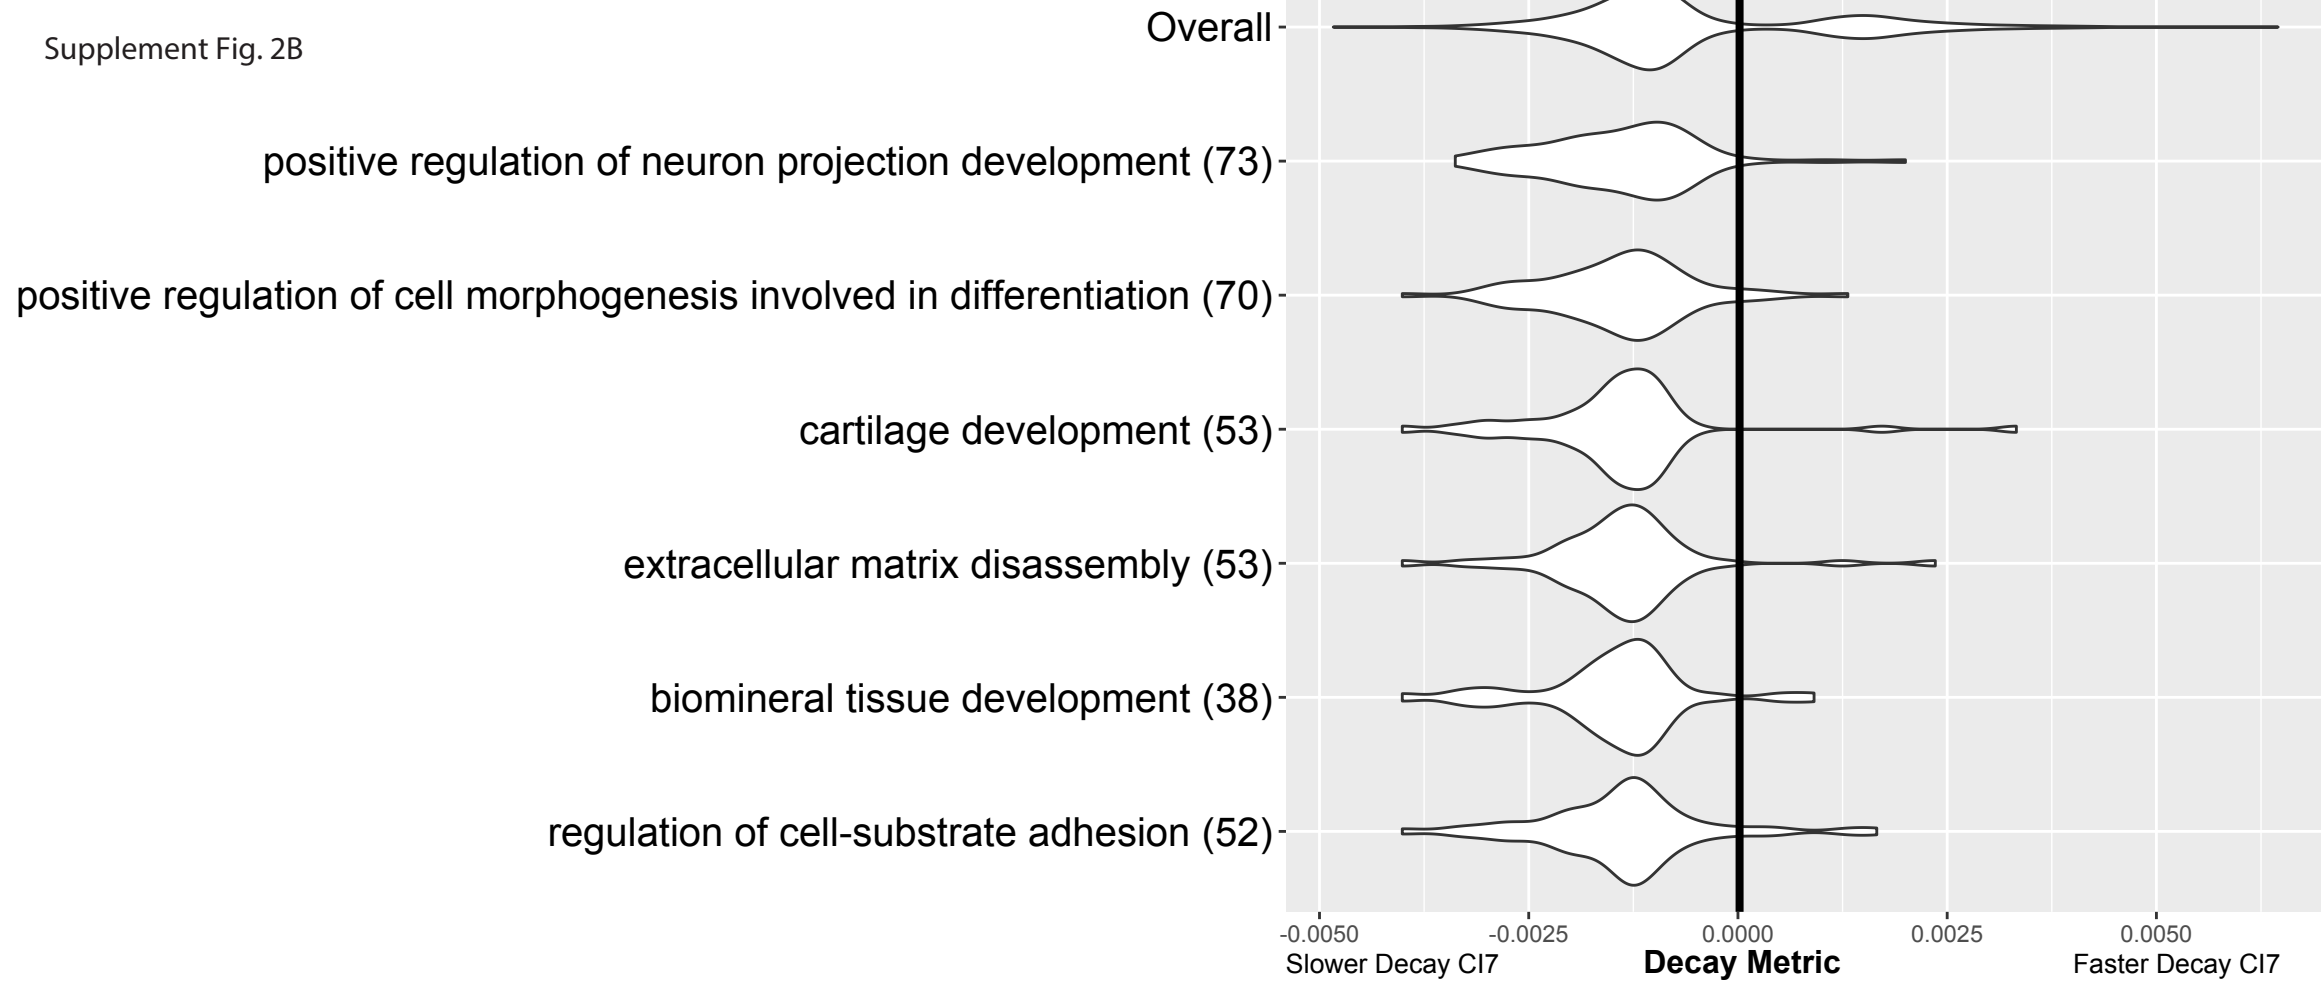

Supplement: 12864_2017_3521_MOESM3_ESM.pdf [file 12864_2017_3521_MOESM3_ESM.pdf]
